# Supplementary material
Source: PubMed Central journal article supplement (PMC8285913)
Supplement: pnas.2023718118.sapp.pdf [file pnas.2023718118.sapp.pdf]

## 1 SUPPLEMENTARY INFORMATION APENDIX

# 2 Negative effects of nitrogen override positive effects of 3 phosphorus on grassland legumes worldwide

4  
5 Pedro M. Tognetti<sup>1†</sup>, Suzanne M. Prober<sup>2†</sup>, Selene Báez<sup>3</sup>, Enrique J. Chaneton<sup>1</sup>, Jennifer Firn<sup>4</sup>, Anita  
6 C. Risch<sup>5</sup>, Martin Schuetz<sup>5</sup>, Anna K. Simonsen<sup>6,7</sup>, Laura Yahdjian<sup>1</sup>, Elizabeth T. Borer<sup>8</sup>, Eric W.  
7 Seabloom<sup>8</sup>, Carlos Alberto Arnillas<sup>9</sup>, Jonathan D. Bakker<sup>10</sup>, Cynthia S. Brown<sup>11</sup>, Marc W. Cadotte<sup>9</sup>,  
8 Maria C. Caldeira<sup>12</sup>, Pedro Daleo<sup>13</sup>, John M. Dwyer<sup>14</sup>, Philip A. Fay<sup>15</sup>, Laureano A. Gherardi<sup>16</sup>, Nicole  
9 Hagenah<sup>17</sup>, Yann Hautier<sup>18</sup>, Kimberly J Komatsu<sup>19</sup>, Rebecca L. McCulley<sup>20</sup>, Jodi N. Price<sup>21</sup>, Rachel J.  
10 Standish<sup>22</sup>, Carly J. Stevens<sup>23</sup>, Peter D. Wragg<sup>24</sup>, Mahesh Sankaran<sup>25,26</sup>

11  
12 <sup>1</sup> IFEVA-CONICET, Facultad de Agronomía, Universidad de Buenos Aires, C1417DSE, CABA, Argentina / <sup>2</sup> CSIRO  
13 Land and Water, Private Bag 5, Wembley, Western Australia 6913, Australia / <sup>3</sup> Department of Biology, Escuela  
14 Politécnica Nacional del Ecuador, Quito, Ecuador / <sup>4</sup> Queensland University of Technology (QUT), Brisbane,  
15 Queensland 4001, Australia / <sup>5</sup> Swiss Federal Institute for Forest, Snow and Landscape Research WSL,  
16 Zuercherstrasse 111, 8903 Birmensdorf, Switzerland / <sup>6</sup> Australian National University, Canberra, Australian  
17 Capital Territory, 2601, Australia / <sup>7</sup> Department of Biological Sciences, Florida International University, Miami,  
18 Florida, 33199, USA / <sup>8</sup> Department of Ecology, Evolution & Behavior, University of Minnesota, St. Paul, MN  
19 55108, USA / <sup>9</sup> Department of Biological Sciences, University of Toronto Scarborough, 1265 Military Trail,  
20 Toronto, ON, M1C 2M2, Canada / <sup>10</sup> School of Environmental and Forest Sciences, University of Washington,  
21 Seattle, WA 98195, USA / <sup>11</sup> Department of Agricultural Biology, Graduate Degree Program in Ecology, 1177  
22 Campus Delivery, Colorado State University, Fort Collins, Colorado 80523, USA / <sup>12</sup> Centro de Estudos Florestais,  
23 Instituto Superior de Agronomia, Universidade de Lisboa, 1349-017 Lisbon, Portugal / <sup>13</sup> IIMyC, UNMdP-  
24 CONICET, Casilla de Correo 1260, Mar del Plata, Argentina / <sup>14</sup> School of Biological Sciences, The University of  
25 Queensland, St Lucia QLD 4072 – CSIRO, Ecosciences Precinct, Dutton Park QLD 4102, Australia / <sup>15</sup> USDA-ARS  
26 Grassland, Soil, and Water Research Lab, Temple, Texas 76502, USA / <sup>16</sup> Arizona State University - School of Life  
27 Sciences, Mail code 4601, LSA 259, Arizona, USA / <sup>17</sup> Mammal Research Institute, Department of Zoology &  
28 Entomology, University of Pretoria, Pretoria, South Africa / <sup>18</sup> Ecology and Biodiversity Group, Department of  
29 Biology, Utrecht University, Padualaan 8, 3584 CH Utrecht, The Netherlands / <sup>19</sup> Smithsonian Environmental  
30 Research Center, Edgewater, Maryland 21037, USA / <sup>20</sup> Department of Plant & Soil Sciences, University of  
31 Kentucky, Lexington, Kentucky, 40546-0312, USA / <sup>21</sup> Institute of Land, Water and Society, Charles Sturt  
32 University, Albury, NSW, 2640, Australia / <sup>22</sup> Environmental and Conservation Sciences, Murdoch University, 90  
33 South Street Murdoch WA 6150, Australia / <sup>23</sup> Lancaster Environment Centre, Lancaster University, Lancaster,  
34 LA1 4YQ, UK / <sup>24</sup> University of Minnesota, Department of Forest Resources, 1530 Cleveland Ave N, St. Paul, MN  
35 55108, USA / <sup>25</sup> National Centre for Biological Sciences, Tata Institute of Fundamental Research, Bengaluru  
36 560065, Karnataka, India / <sup>26</sup> School of Biology, University of Leeds, Leeds LS2 9JT, UK

37  
38 †Joint first authors

39  
40 \* Corresponding Authors: Pedro M. Tognetti; Suzanne Prober.

41 Email ; [tognetti@agro.uba.ar](mailto:tognetti@agro.uba.ar) ; [Suzanne.Prober@csiro.au](mailto:Suzanne.Prober@csiro.au)

42 **SUPPLEMENTARY INFORMATION**

43 *Supplementary figures*

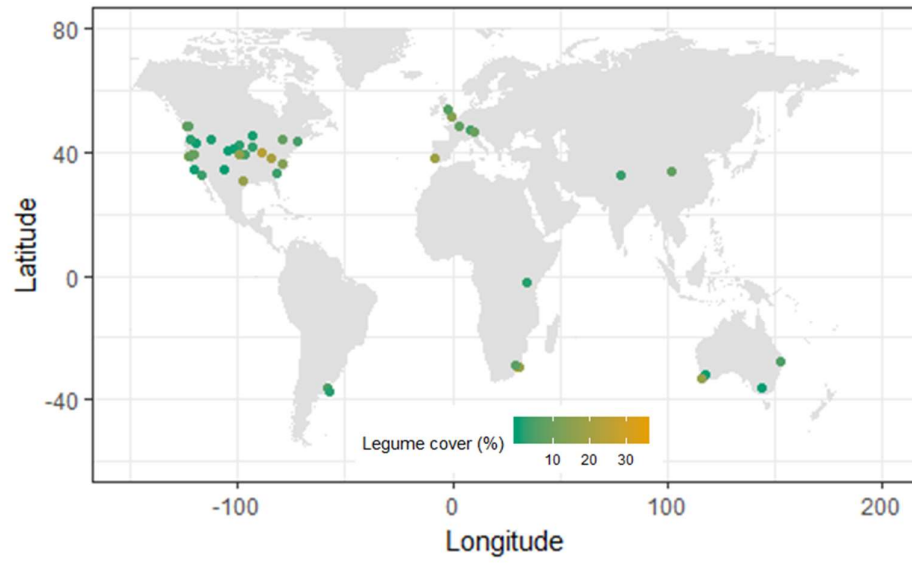

44

45 **Fig. S1.** Location of the 45 experimental sites. Colour scale represents the mean initial abundance of  
46 N-fixing legumes (%). See Table S1 for details about each site.

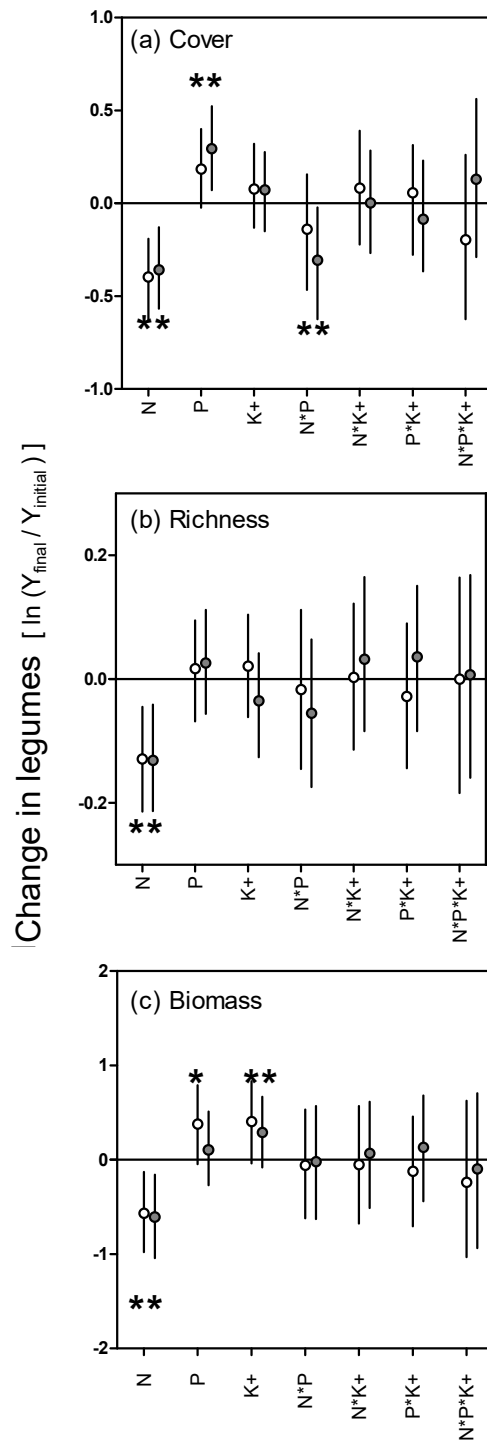

47

48 **Fig. S2.** Estimated effects of N, P, K+ from mixed models of change in cover (a), richness (b) and  
 49 biomass (c) of legumes by the 3<sup>rd</sup> year (open circles) and last year (filled circles) of the experiment.  
 50 Interactions (i.e. N\*P, N\*K+, P\*K+, and N\*P\*K+) test for additivity, with significant positive or  
 51 negative values indicating positive or negative super-additivity, when compared with respective  
 52 individual nutrient effects (see Results). Symbols are the estimates  $\pm$  bootstrapped 95% confidence  
 53 intervals for the model parameters of the complete model. Asterisks indicate significant terms  
 54 remaining in the reduced model (\*P < 0.05 see Table S3).

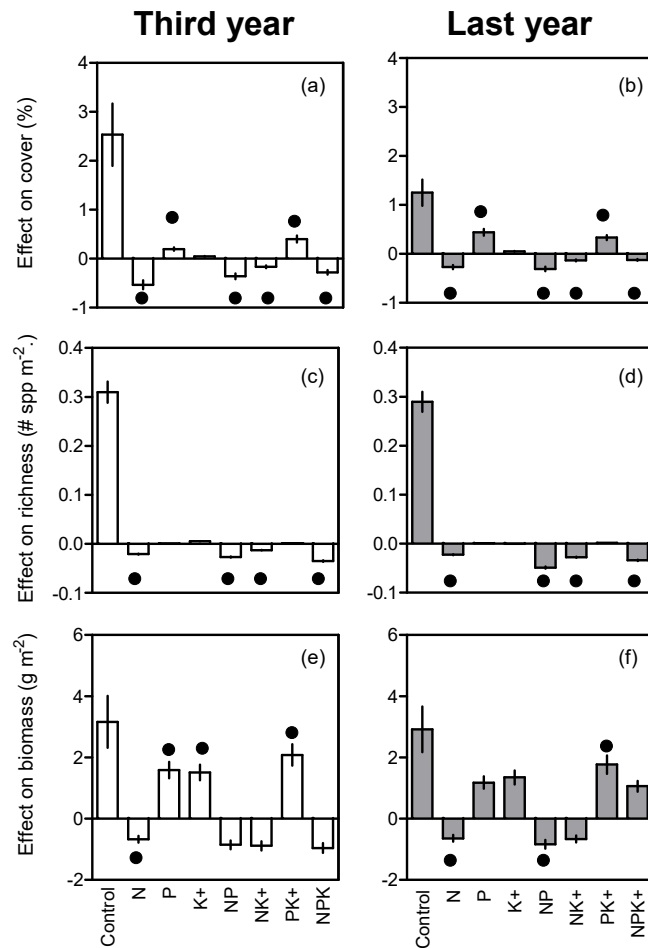

55

56 **Fig. S3.** Response of legume cover (a-b), richness (c-d) and biomass (e-f) for the third year (left  
57 column) and last (third to sixth) year after initiation of the experiment (right column). Responses  
58 were expressed in their original values after back transformations. Positive and negative values  
59 indicate increases and decreases in relation to control (first bar; presented for reference),  
60 respectively. Initial legume cover, richness and biomass covariable coefficients were all significant  
61 and positive. Bars are means  $\pm$  standard error of the means and dots (•) indicate treatment means  
62 statistically differed from controls. Note the different Y-axis ranges. Cover and richness data were  
63 available for 45 sites and biomass data for 26 sites. Simplified model in Table S4.

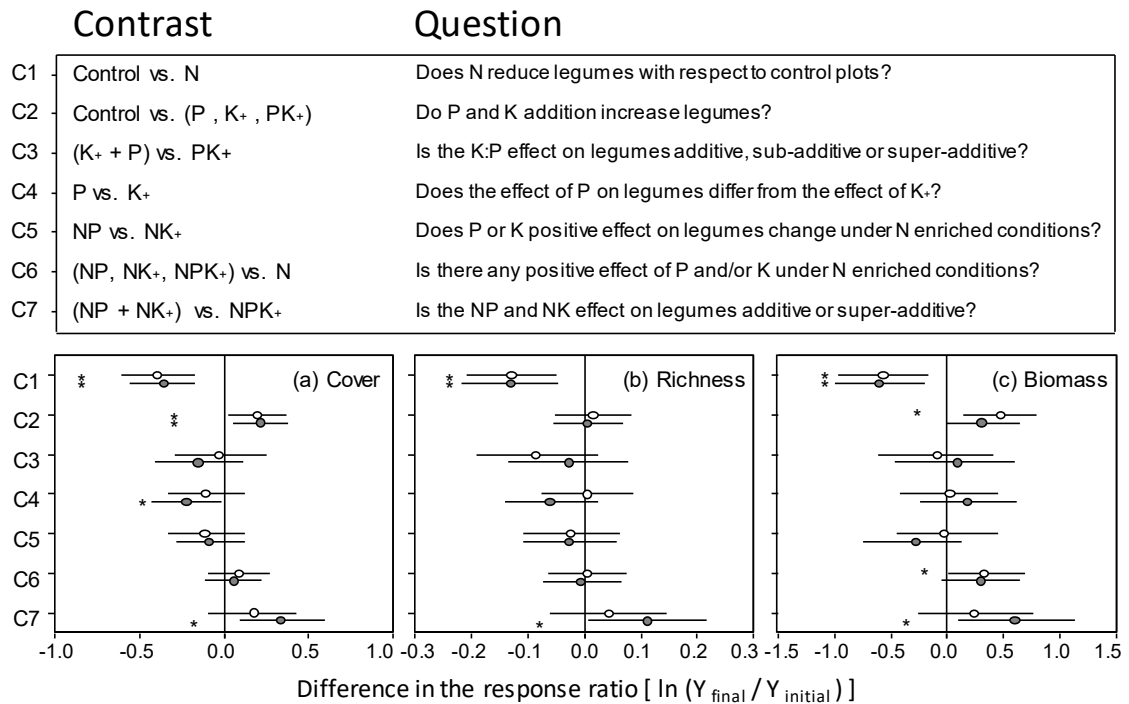

64

65 **Fig. S4.** Differences in the response ratio of legume cover (a), richness (b) and biomass (c) following  
 66 planned contrasts (C1-C7; upper panel) for the 3<sup>rd</sup> year (open) and last year (filled). The ‘*comma*’  
 67 indicates that the effects are averaged to test mean effect, whereas ‘*sum*’ indicates that the effects  
 68 are summed to test additivity. Symbols are the estimates  $\pm$  bootstrapped 95% confidence intervals.  
 69 Asterisks indicate that the contrast is different from zero (bootstrapped confidence intervals do not  
 70 cross zero; see Table S5). Cover and richness data were available for 45 sites, and biomass data for 26  
 71 sites.

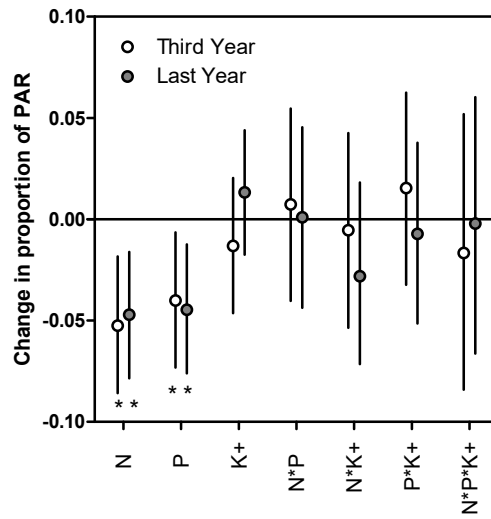

73

74 **Fig. S5.** Change in the proportion of PAR reaching the ground due to the addition of N, P, K+, and  
 75 their interactions (i.e., N\*P, N\*K+, P\*K+, and N\*P\*K+) for the 3<sup>rd</sup> (open) and last (filled) years.  
 76 Symbols are estimates ± bootstrapped 95% confidence intervals. Asterisks indicate that the contrast  
 77 differs from zero (i.e., bootstrapped confidence intervals do not include zero), where zero is the  
 78 average proportion of PAR reaching the soil surface in control plots (0.375 and 0.387 for the 3<sup>rd</sup> and  
 79 last year, respectively).

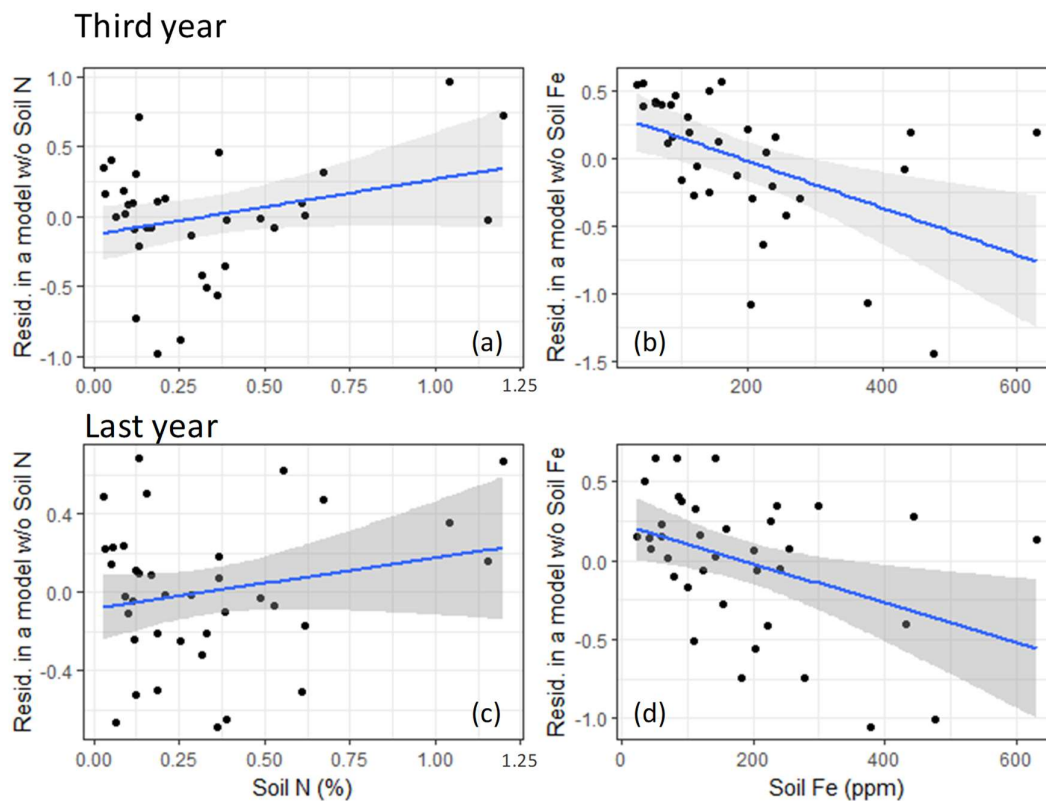

81

82 **Fig. S6.** Initial soil N (a, c) and soil Fe (b, d) predicted the effect of N addition on the change in legume  
83 cover by the third year (top row) and the last year (bottom row) of the experiment. In each graph,  
84 the Y-axis shows the residuals of the legume LR due to N addition; positive and negative values  
85 indicate increases and decreases, respectively. All trends shown are significant ( $P < 0.05$ ). See Table  
86 S9 for complete results.

87

88

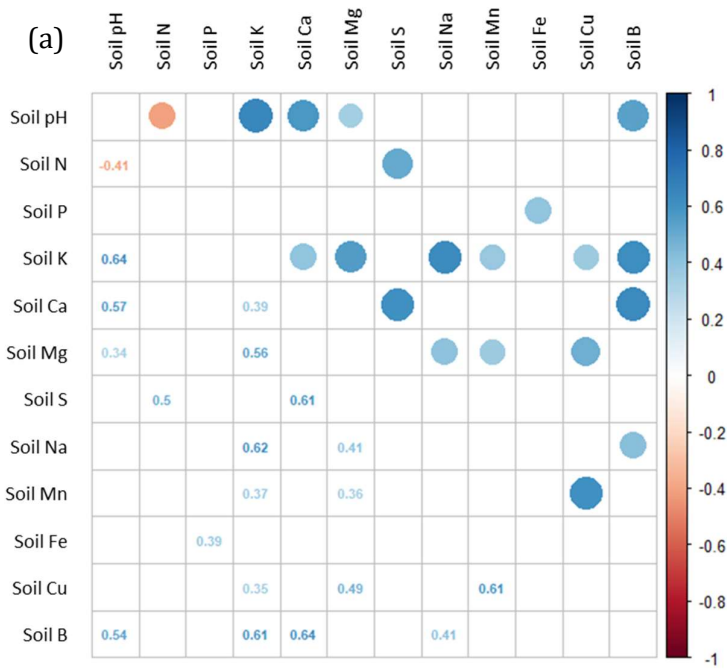

89

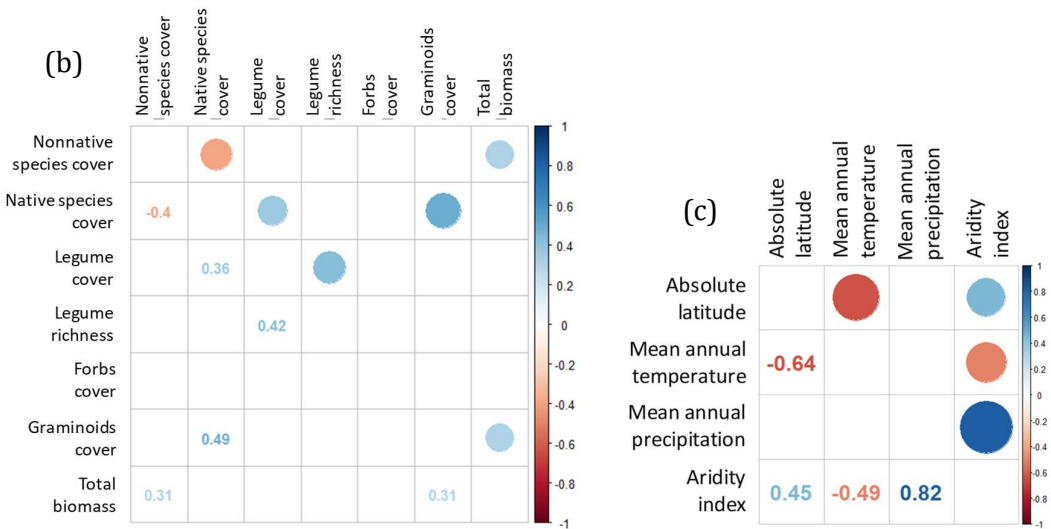

90 **Fig. S7.** Correlation coefficients among site level soil (a), community (b) and climatic (c) predictors  
 91 used in the contingency regression analysis (Suppl. Tables S9, S10, S11). The circles above the  
 92 diagonal represent the strength (size) and direction (colour) of the significant ( $P < 0.05$ ) Pearson's  
 93 correlation coefficients; numbers below the diagonal show the corresponding correlation  
 94 coefficients.



95 *Supplementary Tables*

96 Table S1. List of sites included in the present study. Biomass indicated is the average live biomass across all experimental years for the control (unfertilized)  
 97 plots. See details in the text for methods. Nat.=natural, Ant=anthropic, 'NA': data not available.

| Id | Site        | Country   | Habitat            | Natural<br>Anthropic | Legume<br>cover<br>(%) | Legume<br>richness<br>(# spp.) | Exper.<br>length<br>(yr) | Blocks<br>(#) | Lat-<br>itude | Lon-<br>gitude | Elev-<br>ation<br>(m.a.s.l.) | Mean<br>Annual<br>Temp.<br>(*C) | Mean<br>Annual<br>Precip.<br>(mm) | Biomass<br>[cntrl<br>plots]<br>(g m <sup>-1</sup> ) | Total<br>soil N<br>(%) | Extr.<br>soil P<br>(ppm) |
|----|-------------|-----------|--------------------|----------------------|------------------------|--------------------------------|--------------------------|---------------|---------------|----------------|------------------------------|---------------------------------|-----------------------------------|-----------------------------------------------------|------------------------|--------------------------|
| 1  | azi.cn      | China     | Alpine grassland   | Nat.                 | 7.59                   | 4                              | 5                        | 3             | 33.7          | 101.9          | 3500                         | 2.0                             | 667                               | 361.2                                               | 0.554                  | 70.50                    |
| 2  | barta.us    | USA       | Mixedgrass prairie | Nat.                 | 2.05                   | 1                              | 4                        | 3             | 42.2          | -99.7          | 767                          | 8.7                             | 597                               | 232.1                                               | 0.058                  | 17.25                    |
| 3  | bnch.us     | USA       | Montane grassland  | Nat.                 | 18.47                  | 3                              | 6                        | 3             | 44.3          | -122.0         | 1318                         | 5.5                             | 1647                              | 204.2                                               | 0.618                  | 13.87                    |
| 4  | cbgb.us     | USA       | Tallgrass prairie  | Ant.                 | 1.90                   | 2                              | 6                        | 6             | 41.8          | -93.4          | 275                          | 9.0                             | 855                               | 424.6                                               | 0.063                  | 62.81                    |
| 5  | cdcr.us     | USA       | Tallgrass prairie  | Nat.                 | 0.75                   | 1                              | 6                        | 5             | 45.4          | -93.2          | 270                          | 6.3                             | 750                               | 156.8                                               | 0.051                  | 61.46                    |
| 6  | cdpt.us     | USA       | Shortgrass prairie | Nat.                 | 0.50                   | 2                              | 6                        | 6             | 41.2          | -101.6         | 965                          | 9.5                             | 445                               | 141.2                                               | 0.115                  | 32.60                    |
| 7  | cereep.fr   | France    | Old field          | Ant.                 | 7.57                   | 4                              | 3                        | 3             | 48.3          | 2.7            | 83                           | 11.0                            | 642                               | 567.7                                               | 0.131                  | 127.42                   |
| 8  | chilcas.ar  | Argentina | Mesic grassland    | Nat.                 | 5.24                   | 2                              | 3                        | 3             | -36.3         | -58.3          | 15                           | 15.1                            | 925                               | 804.8                                               | 0.361                  | 22.50                    |
| 9  | comp.pt     | Portugal  | Annual grassland   | Ant.                 | 18.80                  | 7                              | 3                        | 3             | 38.8          | -8.8           | 200                          | 16.5                            | 554                               | 171.9                                               | 0.121                  | 34.17                    |
| 10 | cowi.ca     | Canada    | Old field          | Nat.                 | 9.25                   | 4                              | 6                        | 3             | 48.5          | -123.4         | 50                           | 9.8                             | 764                               | 530.3                                               | 0.391                  | 40.13                    |
| 11 | elliot.us   | USA       | Annual grassland   | Nat.                 | 4.27                   | 2                              | 6                        | 3             | 32.9          | -117.1         | 200                          | 17.2                            | 331                               | 244.2                                               | 0.156                  | 16.46                    |
| 12 | frue.ch     | Switz.    | Pasture            | Ant.                 | 3.78                   | 2                              | 6                        | 3             | 47.1          | 8.5            | 995                          | 6.5                             | 1355                              | 837.5                                               | 0.367                  | 69.79                    |
| 13 | gilb.za     | S. Africa | Montane grassland  | Nat.                 | 35.14                  | 5                              | 3                        | 3             | -29.3         | 30.3           | 1748                         | 13.1                            | 926                               | 221.9                                               | 1.155                  | 17.67                    |
| 14 | hart.us     | USA       | Shrub steppe       | Nat.                 | 0.27                   | 2                              | 5                        | 3             | 42.7          | -119.5         | 1508                         | 7.4                             | 272                               | 88.6                                                | 0.103                  | 67.13                    |
| 15 | hero.uk     | UK        | Mesic grassland    | Nat.                 | 13.97                  | 3                              | 6                        | 3             | 51.4          | -0.6           | 60                           | 9.9                             | 692                               | 508.9                                               | NA                     | NA                       |
| 16 | hnvr.us     | USA       | Old field          | Ant.                 | 4.20                   | 3                              | 3                        | 3             | 43.4          | -72.1          | 271                          | 6.4                             | 1033                              | 347.3                                               | 0.385                  | 63.08                    |
| 17 | hopl.us     | USA       | Annual grassland   | Nat.                 | 11.29                  | 8                              | 6                        | 3             | 39.0          | -123.1         | 598                          | 12.3                            | 1127                              | 186.6                                               | NA                     | NA                       |
| 18 | kibber.in   | India     | Alpine grassland   | Nat.                 | 2.80                   | 1                              | 3                        | 3             | 32.3          | 78.0           | 4241                         | 1.1                             | 504                               | 34.8                                                | NA                     | NA                       |
| 19 | kiny.au     | Australia | Semiarid grassland | Nat.                 | 0.22                   | 2                              | 6                        | 3             | -36.2         | 143.8          | 90                           | 15.5                            | 426                               | 221.3                                               | 0.117                  | 10.21                    |
| 20 | koffler.ca  | Canada    | Pasture            | Nat.                 | 7.62                   | 1                              | 6                        | 3             | 44.0          | -79.5          | 301                          | 6.4                             | 815                               | 640.6                                               | NA                     | NA                       |
| 21 | konz.us     | USA       | Tallgrass prairie  | Nat.                 | 3.69                   | 3                              | 6                        | 3             | 39.1          | -96.6          | 440                          | 11.9                            | 877                               | 352.7                                               | NA                     | NA                       |
| 22 | lancastr.uk | UK        | Mesic grassland    | Nat.                 | 5.82                   | 2                              | 6                        | 3             | 54.0          | -2.6           | 180                          | 8.0                             | 1322                              | 121.9                                               | 1.039                  | 33.48                    |

| Id | Site      | Country   | Habitat              | Natural<br>Anthropic | Legume<br>cover<br>(%) | Legume<br>richness<br>(# spp.) | Exper.<br>length<br>(yr) | Blocks<br>(#) | Lat-<br>itude | Lon-<br>gitude | Elev-<br>ation<br>(m.a.s.l.) | Mean<br>Annual<br>Temp.<br>(*C) | Mean<br>Annual<br>Precip.<br>(mm) | Biomass<br>[cntrl<br>plots]<br>(g m <sup>-1</sup> ) | Total<br>soil N<br>(%) | Extr.<br>soil P<br>(ppm) |
|----|-----------|-----------|----------------------|----------------------|------------------------|--------------------------------|--------------------------|---------------|---------------|----------------|------------------------------|---------------------------------|-----------------------------------|-----------------------------------------------------|------------------------|--------------------------|
| 23 | look.us   | USA       | Montane grassland    | Nat.                 | 1.65                   | 1                              | 6                        | 3             | 44.2          | -122.1         | 1500                         | 4.8                             | 1898                              | 243.9                                               | 1.197                  | 54.00                    |
| 24 | marc.ar   | Argentina | Salt marsh grassland | Nat.                 | 1.55                   | 3                              | 5                        | 3             | -37.7         | -57.4          | 6                            | 13.9                            | 838                               | 555.6                                               | NA                     | NA                       |
| 25 | mcla.us   | USA       | Annual grassland     | Nat.                 | 6.57                   | 5                              | 6                        | 3             | 38.9          | -122.4         | 642                          | 13.5                            | 867                               | 257.4                                               | NA                     | NA                       |
| 26 | mtca.au   | Australia | Savanna              | Nat.                 | 0.26                   | 2                              | 6                        | 4             | -31.8         | 117.6          | 285                          | 17.3                            | 330                               | 134.2                                               | 0.092                  | 9.25                     |
| 27 | ping.au   | Australia | Old field            | Ant.                 | 16.51                  | 2                              | 3                        | 3             | -32.5         | 117.0          | 338                          | 16.2                            | 483                               | 225.3                                               | 0.133                  | 15.21                    |
| 28 | pinj.au   | Australia | Pasture              | Ant.                 | 4.89                   | 3                              | 3                        | 3             | -27.5         | 152.9          | 38                           | 20.3                            | 1133                              | 691.0                                               | 0.486                  | 142.71                   |
| 29 | sage.us   | USA       | Montane grassland    | Nat.                 | 10.08                  | 1                              | 6                        | 3             | 39.4          | -120.2         | 1920                         | 5.7                             | 882                               | 123.7                                               | 0.670                  | 35.25                    |
| 30 | saline.us | USA       | Mixedgrass prairie   | Nat.                 | 17.40                  | 4                              | 6                        | 3             | 39.1          | -99.1          | 440                          | 11.8                            | 607                               | 240.6                                               | NA                     | NA                       |
| 31 | sava.us   | USA       | Savanna              | Nat.                 | 3.14                   | 4                              | 5                        | 2             | 33.3          | -81.7          | 71                           | 17.3                            | 1194                              | 85.4                                                | 0.027                  | 45.94                    |
| 32 | sedg.us   | USA       | Annual grassland     | Nat.                 | 0.58                   | 2                              | 6                        | 3             | 34.7          | -120.0         | 550                          | 14.9                            | 521                               | 281.1                                               | 0.188                  | 66.13                    |
| 33 | sereng.tz | Tanzania  | Savanna              | Nat.                 | 1.76                   | 2                              | 4                        | 3             | -2.3          | 34.5           | 1536                         | 22.1                            | 854                               | 298.8                                               | 0.125                  | 69.71                    |
| 34 | sevi.us   | USA       | Desert grassland     | Nat.                 | 0.08                   | 1                              | 6                        | 5             | 34.4          | -106.7         | 1600                         | 12.6                            | 252                               | 59.6                                                | 0.032                  | 33.53                    |
| 35 | sgs.us    | USA       | Shortgrass prairie   | Nat.                 | 0.33                   | 1                              | 6                        | 3             | 40.8          | -104.8         | 1650                         | 8.4                             | 365                               | 101.9                                               | 0.085                  | 64.23                    |
| 36 | shps.us   | USA       | Shrub steppe         | Nat.                 | 0.80                   | 2                              | 6                        | 4             | 44.2          | -112.2         | 910                          | 5.5                             | 262                               | 127.8                                               | 0.207                  | 37.63                    |
| 37 | sier.us   | USA       | Annual grassland     | Nat.                 | 9.68                   | 4                              | 6                        | 5             | 39.2          | -121.3         | 197                          | 15.6                            | 935                               | 234.9                                               | 0.188                  | 18.33                    |
| 38 | smith.us  | USA       | Mesic grassland      | Nat.                 | 6.87                   | 5                              | 6                        | 3             | 48.2          | -122.6         | 62                           | 9.8                             | 597                               | 399.7                                               | 0.527                  | 75.04                    |
| 39 | spin.us   | USA       | Pasture              | Ant.                 | 22.00                  | 2                              | 6                        | 3             | 38.1          | -84.5          | 271                          | 12.5                            | 1140                              | 391.0                                               | 0.255                  | 227.63                   |
| 40 | summ.za   | S. Africa | Mesic grassland      | Nat.                 | 17.19                  | 5                              | 3                        | 3             | -29.8         | 30.7           | 679                          | 18.2                            | 939                               | 365.9                                               | 0.330                  | 12.16                    |
| 41 | temple.us | USA       | Tallgrass prairie    | Nat.                 | 18.06                  | 3                              | 6                        | 3             | 31.0          | -97.3          | 184                          | 19.1                            | 871                               | 517.0                                               | 0.366                  | 20.60                    |
| 42 | trel.us   | USA       | Tallgrass prairie    | Nat.                 | 24.12                  | 1                              | 5                        | 3             | 40.1          | -88.8          | 200                          | 11.0                            | 982                               | 1124.3                                              | 0.285                  | 51.92                    |
| 43 | ukul.za   | S. Africa | Mesic grassland      | Nat.                 | 6.98                   | 5                              | 6                        | 3             | -29.7         | 30.4           | 843                          | 18.1                            | 880                               | 488.4                                               | 0.318                  | 9.27                     |
| 44 | unc.us    | USA       | Old field            | Ant.                 | 13.22                  | 3                              | 4                        | 3             | 36.0          | -79.0          | 141                          | 14.6                            | 1163                              | 330.6                                               | 0.169                  | 21.71                    |
| 45 | valm.ch   | Switz.    | Alpine grassland     | Nat.                 | 7.57                   | 5                              | 6                        | 3             | 46.6          | 10.4           | 2320                         | 0.3                             | 1098                              | 218.4                                               | 0.610                  | 46.00                    |

99 **Tables S2.** List of genera of legume species included in the experiment. # Sites: number of sites  
 100 where each genus is present. # Sp: Number of species considered in each genus. Mean: mean  
 101 cover (visual percent scale; see Methods section for further details) across all plots where  
 102 genus is present.

| Genera                 | # Sites | # Species | Mean  |
|------------------------|---------|-----------|-------|
| <i>Acacia</i>          | 1       | 2         | 7.80  |
| <i>Acmispon</i>        | 4       | 3         | 5.20  |
| <i>Adesmia</i>         | 1       | 1         | 1.00  |
| <i>Aeschynomene</i>    | 2       | 1         | 2.80  |
| <i>Alysicarpus</i>     | 2       | 2         | 3.13  |
| <i>Amorpha</i>         | 3       | 1         | 5.76  |
| <i>Anthyllis</i>       | 1       | 1         | 1.88  |
| <i>Argyrolobium</i>    | 2       | 4         | 1.54  |
| <i>Astragalus</i>      | 8       | 12        | 1.57  |
| <i>Baptisia</i>        | 1       | 2         | 3.07  |
| <i>Caragana</i>        | 1       | 1         | 16.47 |
| <i>Centrosema</i>      | 1       | 1         | 2.38  |
| <i>Chamaecrista</i>    | 4       | 5         | 3.45  |
| <i>Crotalaria</i>      | 4       | 4         | 5.68  |
| <i>Cytisus</i>         | 1       | 1         | 30.00 |
| <i>Dalea</i>           | 3       | 3         | 2.08  |
| <i>Desmanthus</i>      | 1       | 1         | 25.40 |
| <i>Desmodium</i>       | 4       | 5         | 2.66  |
| <i>Eriosema</i>        | 3       | 4         | 9.31  |
| <i>Glycine</i>         | 1       | 1         | 2.29  |
| <i>Gueldenstaedtia</i> | 1       | 1         | 2.19  |
| <i>Hippocrepis</i>     | 1       | 1         | 4.21  |
| <i>Indigofera</i>      | 5       | 7         | 4.67  |
| <i>Kummerowia</i>      | 1       | 1         | 1.82  |
| <i>Lathyrus</i>        | 5       | 7         | 3.58  |
| <i>Lespedeza</i>       | 6       | 6         | 4.98  |
| <i>Lotononis</i>       | 1       | 1         | 1.00  |
| <i>Lotus</i>           | 8       | 6         | 4.95  |
| <i>Lupinus</i>         | 10      | 11        | 5.15  |
| <i>Medicago</i>        | 7       | 5         | 4.81  |
| <i>Melilotus</i>       | 5       | 3         | 6.70  |
| <i>Mimosa</i>          | 3       | 2         | 18.08 |
| <i>Neonotonia</i>      | 1       | 1         | 9.00  |
| <i>Ornithopus</i>      | 1       | 2         | 8.19  |
| <i>Oxytropis</i>       | 3       | 3         | 2.21  |
| <i>Pearsonia</i>       | 1       | 2         | 5.09  |
| <i>Pisum</i>           | 1       | 1         | 1.00  |
| <i>Psoralea</i>        | 5       | 3         | 4.24  |
| <i>Psoralidium</i>     | 1       | 1         | 13.89 |
| <i>Rhynchosia</i>      | 3       | 3         | 3.85  |
| <i>Schrankia</i>       | 1       | 1         | 2.08  |
| <i>Swainsona</i>       | 1       | 1         | 1.00  |
| <i>Syrmatium</i>       | 1       | 1         | 10.80 |
| <i>Tephrosia</i>       | 4       | 5         | 4.01  |
| <i>Thermopsis</i>      | 1       | 1         | 2.37  |
| <i>Tibetia</i>         | 1       | 1         | 1.59  |
| <i>Trifolium</i>       | 21      | 25        | 4.47  |
| <i>Vicia</i>           | 18      | 11        | 5.33  |
| <i>Vigna</i>           | 1       | 1         | 4.80  |
| <i>Zornia</i>          | 2       | 1         | 1.83  |
| Unknown species        | 5       | 3         | 1.73  |

104 **Table S3.** Estimated means (Estim.) and bootstrapped 95% confidence intervals for the relative  
 105 change in cover (a), richness (b), and biomass (c) of N-fixing legumes in the third and last years  
 106 of the study. Variables shown are those retained in the reduced models after AIC elimination.  
 107 Bold indicates that the confidence interval 95% does not include zero. 'n' indicates the number  
 108 of sites included in the analyses. R<sup>2</sup> indicates the approximate proportion of variance explained  
 109 by fixed / random model terms.

110  
 111 a) Cover

| Coeff.    | Third year |               |                           |               | Last year |               |                          |               |
|-----------|------------|---------------|---------------------------|---------------|-----------|---------------|--------------------------|---------------|
|           | df         | Estim.        | 2.5%                      | 97.5%         | df        | Estim.        | 2.5%                     | 97.5%         |
| Intercept | 1,56       | 0.229         | -0.055                    | 0.484         | 1,59      | -0.026        | -0.276                   | 0.224         |
| N         | 1,1018     | <b>-0.353</b> | <b>-0.514</b>             | <b>-0.191</b> | 1,1055    | <b>-0.356</b> | <b>-0.507</b>            | <b>-0.200</b> |
| P         | 1,1018     | <b>0.214</b>  | <b>0.054</b>              | <b>0.368</b>  | 1,1055    | <b>0.253</b>  | <b>0.113</b>             | <b>0.387</b>  |
| N:P       | 1,1018     | <b>-0.240</b> | <b>-0.448</b>             | <b>-0.017</b> | 1,1055    | <b>-0.243</b> | <b>-0.455</b>            | <b>-0.049</b> |
|           |            | n=43          | R <sup>2</sup> : 3.4/48.8 |               |           | n=45          | R <sup>2</sup> :4.1/48.3 |               |

112

113 b) Richness

| Coeff.    | Third year |               |                           |               | Last year     |               |                          |               |
|-----------|------------|---------------|---------------------------|---------------|---------------|---------------|--------------------------|---------------|
|           | df         | Estim.        | 2.5%                      | 97.5%         | df            | Estim.        | 2.5%                     | 97.5%         |
| Intercept | 1,46       | -0.026        | -0.300                    | 0.232         | 1,49          | -0.034        | -0.120                   | 0.055         |
| N         | 1,1019     | <b>-0.356</b> | <b>-0.509</b>             | <b>-0.214</b> | <b>1,1055</b> | <b>-0.140</b> | <b>-0.182</b>            | <b>-0.097</b> |
|           |            | n=43          | R <sup>2</sup> : 2.1/39.7 |               |               | n=45          | R <sup>2</sup> :2.1/40.3 |               |

114

115 c) Biomass

| Coeff.    | Third year |               |                           |               | Last year    |               |                          |               |
|-----------|------------|---------------|---------------------------|---------------|--------------|---------------|--------------------------|---------------|
|           | df         | Estim.        | 2.5%                      | 97.5%         | df           | Estim.        | 2.5%                     | 97.5%         |
| Intercept | 1,30       | 0.217         | -0.377                    | 0.755         | 1,29         | 0.110         | -0.413                   | 0.604         |
| N         | 1,593      | <b>-0.683</b> | <b>-0.883</b>             | <b>-0.475</b> | <b>1,602</b> | <b>-0.607</b> | <b>-0.816</b>            | <b>-0.405</b> |
| P         | 1,593      | <b>0.229</b>  | <b>0.018</b>              | <b>0.424</b>  | ---          | ---           | ---                      | ---           |
| K         | 1,593      | <b>0.258</b>  | <b>0.043</b>              | <b>0.445</b>  | <b>1,601</b> | <b>0.364</b>  | <b>0.177</b>             | <b>0.567</b>  |
|           |            | n=26          | R <sup>2</sup> : 3.7/52.3 |               |              | n=26          | R <sup>2</sup> :3.4/47.9 |               |

116

117 **Table S4.** Estimated means (Estim.) and bootstrapped 95% confidence intervals for the  
 118 absolute change in cover (a), richness (b), and biomass (c) of N-fixing legumes in the third and  
 119 last years of the study. Variables shown are those retained in the reduced models after AIC  
 120 elimination. Bold indicates that the confidence interval 95% does not include zero. 'n' indicates  
 121 the number of sites included in the analyses. R<sup>2</sup> indicates the proportion of variance explained  
 122 by fixed / random model terms. sq.LEGO= Square root of initial legume cover; sq.RLEGO=  
 123 square root of initial legume richness. ln.BLEGO= logarithm of initial legume cover.

124  
125 a) Cover

| Coeff.    | Third year |               |               |                            | Last year |               |               |               |                           |
|-----------|------------|---------------|---------------|----------------------------|-----------|---------------|---------------|---------------|---------------------------|
|           | df         | Estim.        | 2.50%         | 97.50%                     | df        | Estim.        | 2.50%         | 97.50%        |                           |
| Intercept | 1, 64      | <b>1.600</b>  | <b>1.128</b>  | <b>2.082</b>               | 1, 70     | <b>1.165</b>  | <b>0.767</b>  | <b>1.566</b>  |                           |
| N         | 1, 1015    | <b>-0.676</b> | <b>-0.919</b> | <b>-0.437</b>              | 1, 1050   | <b>-0.553</b> | <b>-0.772</b> | <b>-0.335</b> |                           |
| P         | 1, 1014    | <b>0.432</b>  | <b>0.197</b>  | <b>0.677</b>               | 1, 1050   | <b>0.509</b>  | <b>0.295</b>  | <b>0.722</b>  |                           |
| K         | 1, 1014    | <b>0.200</b>  | <b>0.028</b>  | <b>0.372</b>               | 1, 1049   | 0.128         | -0.025        | 0.277         |                           |
| N:P       | 1, 1014    | <b>-0.428</b> | <b>-0.773</b> | <b>-0.090</b>              | 1, 1050   | <b>-0.519</b> | <b>-0.823</b> | <b>-0.211</b> |                           |
| sq.LEGO   | 1, 925     | <b>0.336</b>  | <b>0.265</b>  | <b>0.405</b>               | 1, 1007   | <b>0.340</b>  | <b>0.279</b>  | <b>0.402</b>  |                           |
| n=43      |            |               |               | R <sup>2</sup> : 13.7/54.2 | n=45      |               |               |               | R <sup>2</sup> :16.4/58.1 |

126

127 b) Richness

| Coeff.    | Third year |               |               |                            | Last year |               |               |               |                           |
|-----------|------------|---------------|---------------|----------------------------|-----------|---------------|---------------|---------------|---------------------------|
|           | df         | Estim.        | 2.50%         | 97.50%                     | df        | Estim.        | 2.50%         | 97.50%        |                           |
| Intercept | 1, 65      | <b>0.590</b>  | <b>0.458</b>  | <b>0.722</b>               | 1, 70     | <b>0.532</b>  | <b>0.399</b>  | <b>0.661</b>  |                           |
| N         | 1, 1015    | <b>-0.163</b> | <b>-0.228</b> | <b>-0.099</b>              | 1, 1050   | <b>-0.151</b> | <b>-0.216</b> | <b>-0.087</b> |                           |
| P         | 1, 1014    | 0.001         | -0.063        | 0.065                      | 1, 1050   | 0.045         | -0.018        | 0.110         |                           |
| N:P       | 1, 1014    | -0.049        | -0.141        | 0.041                      | 1, 1050   | -0.089        | -0.180        | 0.003         |                           |
| sq.RLEGO  | 1, 1060    | <b>0.351</b>  | <b>0.294</b>  | <b>0.409</b>               | 1, 1097   | <b>0.324</b>  | <b>0.269</b>  | <b>0.381</b>  |                           |
| n=43      |            |               |               | R <sup>2</sup> : 17.9/58.2 | n=45      |               |               |               | R <sup>2</sup> :16.1/58.1 |

128

129 c) Biomass

| Coeff.    | Third year |               |               |                           | Last year |               |               |               |                          |
|-----------|------------|---------------|---------------|---------------------------|-----------|---------------|---------------|---------------|--------------------------|
|           | df         | Estim.        | 2.50%         | 97.50%                    | df        | Estim.        | 2.50%         | 97.50%        |                          |
| Intercept | 1, 32      | <b>1.276</b>  | <b>0.776</b>  | <b>1.770</b>              | 1, 33     | <b>1.059</b>  | <b>0.584</b>  | <b>1.538</b>  |                          |
| N         | 1, 593     | <b>-0.581</b> | <b>-0.749</b> | <b>-0.409</b>             | 1, 601    | <b>-0.503</b> | <b>-0.671</b> | <b>-0.338</b> |                          |
| P         | 1, 593     | <b>0.278</b>  | <b>0.112</b>  | <b>0.444</b>              | 1, 599    | <b>0.177</b>  | <b>0.005</b>  | <b>0.347</b>  |                          |
| K         | 1, 593     | <b>0.273</b>  | <b>0.106</b>  | <b>0.441</b>              | 1, 600    | <b>0.359</b>  | <b>0.192</b>  | <b>0.529</b>  |                          |
| ln.BLEGO  | 1, 629     | <b>0.192</b>  | <b>0.106</b>  | <b>0.276</b>              | 1, 639    | <b>0.195</b>  | <b>0.110</b>  | <b>0.281</b>  |                          |
| n=26      |            |               |               | R <sup>2</sup> : 6.8/57.9 | n=26      |               |               |               | R <sup>2</sup> :6,4/53.0 |

130

131 **Table S5.** Estimated means (Estim.) and bootstrapped 95% confidence intervals for the  
 132 planned comparisons among specific treatments (contrasts; see Methods and Supplementary  
 133 Fig. S3) of change in legume cover (a), richness (b) and biomass (c) in the third and last years of  
 134 the study. The contrast treatments in the third and last experimental years of each site were  
 135 estimated through a linear mixed effect model, with sites and blocks within sites as random  
 136 effects. Bold indicates that 95% confidence intervals does not include zero. Intercepts were  
 137 omitted as they are not informative for contrasts.

| a) Cover              |        | Third year    |               |               | Last year |               |               |               |
|-----------------------|--------|---------------|---------------|---------------|-----------|---------------|---------------|---------------|
| Contrast              | df     | Estim.        | 2.50%         | 97.50%        | df        | Estim.        | 2.50%         | 97.50%        |
| Control vs. N         | 1,1015 | <b>-0.397</b> | <b>-0.606</b> | <b>-0.172</b> | 1,1051    | <b>-0.359</b> | <b>-0.554</b> | <b>-0.171</b> |
| Control vs (P, K, PK) | 1,1016 | <b>0.192</b>  | <b>0.021</b>  | <b>0.372</b>  | 1,1052    | <b>0.216</b>  | <b>0.051</b>  | <b>0.381</b>  |
| (K + P) vs KP         | 1,1013 | -0.028        | -0.296        | 0.252         | 1,1051    | -0.154        | -0.410        | 0.109         |
| P vs. K               | 1,1013 | -0.108        | -0.330        | 0.124         | 1,1050    | <b>-0.222</b> | <b>-0.429</b> | <b>-0.016</b> |
| NP vs. NK             | 1,1013 | -0.114        | -0.332        | 0.117         | 1,1051    | -0.087        | -0.280        | 0.121         |
| (NP, NK, NPK) vs. N   | 1,1013 | 0.088         | -0.092        | 0.270         | 1,1051    | 0.055         | -0.118        | 0.218         |
| (NK + NP) vs. NPK     | 1,1014 | 0.173         | -0.095        | 0.426         | 1,1051    | <b>0.335</b>  | <b>0.095</b>  | <b>0.592</b>  |

| b) Richness           |        |               |               |               |        |               |               |               |
|-----------------------|--------|---------------|---------------|---------------|--------|---------------|---------------|---------------|
| Contrast              | df     | Estim.        | 2.50%         | 97.50%        | df     | Estim.        | 2.50%         | 97.50%        |
| Control vs. N         | 1,1015 | <b>-0.129</b> | <b>-0.210</b> | <b>-0.049</b> | 1,1050 | <b>-0.131</b> | <b>-0.217</b> | <b>-0.046</b> |
| Control vs (P, K, PK) | 1,1016 | 0.016         | -0.053        | 0.085         | 1,1051 | 0.006         | -0.055        | 0.069         |
| (K + P) vs KP         | 1,1013 | -0.086        | -0.191        | 0.024         | 1,1050 | -0.026        | -0.135        | 0.079         |
| P vs. K               | 1,1013 | 0.005         | -0.077        | 0.087         | 1,1049 | -0.061        | -0.140        | 0.024         |
| NP vs. NK             | 1,1013 | -0.025        | -0.108        | 0.064         | 1,1050 | -0.026        | -0.109        | 0.058         |
| (NP, NK, NPK) vs. N   | 1,1013 | 0.007         | -0.063        | 0.075         | 1,1050 | -0.007        | -0.071        | 0.067         |
| (NK + NP) vs. NPK     | 1,1013 | 0.044         | -0.062        | 0.147         | 1,1050 | <b>0.112</b>  | <b>0.006</b>  | <b>0.216</b>  |

| c) Biomass            |       |               |               |               |       |               |               |               |
|-----------------------|-------|---------------|---------------|---------------|-------|---------------|---------------|---------------|
| Contrast              | df    | Estim.        | 2.50%         | 97.50%        | df    | Estim.        | 2.50%         | 97.50%        |
| Control vs. N         | 1,589 | <b>-0.569</b> | <b>-0.969</b> | <b>-0.164</b> | 1,596 | <b>-0.607</b> | <b>-0.995</b> | <b>-0.197</b> |
| Control vs (P, K, PK) | 1,590 | <b>0.480</b>  | <b>0.147</b>  | <b>0.800</b>  | 1,597 | 0.304         | -0.010        | 0.652         |
| (K + P) vs KP         | 1,589 | -0.090        | -0.610        | 0.416         | 1,598 | 0.091         | -0.463        | 0.600         |
| P vs. K               | 1,589 | 0.026         | -0.414        | 0.452         | 1,595 | 0.185         | -0.238        | 0.613         |
| NP vs. NK             | 1,589 | -0.031        | -0.446        | 0.445         | 1,595 | -0.273        | -0.736        | 0.130         |
| (NP, NK, NPK) vs. N   | 1,589 | <b>0.324</b>  | <b>0.004</b>  | <b>0.692</b>  | 1,595 | 0.302         | -0.048        | 0.640         |
| (NK + NP) vs. NPK     | 1,590 | 0.239         | -0.258        | 0.766         | 1,596 | <b>0.600</b>  | <b>0.098</b>  | <b>1.131</b>  |

139 **Table S6.** Estimated means (Estim.) and bootstrapped 95% confidence intervals for changes in  
 140 forb cover (a), grass cover (b) and forb+grass cover (c) in the third and last years of the study.  
 141 Variables shown are those retained in the reduced models after AIC elimination. Bold indicates  
 142 that confidence interval does not include zero. 'n' indicates the number of sites included in the  
 143 analyses. R<sup>2</sup> indicates the approximate percentage of variance explained by fixed / random  
 144 model terms.  
 145

146

| a) Forbs |        | Third year               |               |               | Last year |                          |               |               |
|----------|--------|--------------------------|---------------|---------------|-----------|--------------------------|---------------|---------------|
| Coeff.   | df     | Estim.                   | 2.50%         | 97.50%        | df        | Estim.                   | 2.50%         | 97.50%        |
| Interc.  | 1,48   | -0.082                   | -0.294        | 0.131         | 1,47      | -0.018                   | -0.210        | 0.174         |
| N        | 1,1017 | -0.086                   | -0.175        | 0.003         | ----      | ----                     | ----          | ----          |
| P        | 1,1017 | <b>-0.110</b>            | <b>-0.198</b> | <b>-0.020</b> | 1,1055    | <b>-0.075</b>            | <b>-0.140</b> | <b>-0.009</b> |
| N:P      | 1,1017 | 0.115                    | -0.009        | 0.243         |           |                          |               |               |
|          | n=43   | R <sup>2</sup> =0.2/61.2 |               |               | n=45      | R <sup>2</sup> =0.2/55.8 |               |               |

147

| b) Grasses |        | Third year               |              |              | Last year |                          |              |              |
|------------|--------|--------------------------|--------------|--------------|-----------|--------------------------|--------------|--------------|
| Coeff.     | df     | Estim.                   | 2.50%        | 97.50%       | df        | Estim.                   | 2.50%        | 97.50%       |
| Interc.    | 1,63   | -0.117                   | -0.280       | 0.044        | 1,50.7    | -0.277                   | -0.524       | -0.027       |
| N          | 1,1018 | <b>0.129</b>             | <b>0.029</b> | <b>0.226</b> | 1,1054    | <b>0.137</b>             | <b>0.029</b> | <b>0.245</b> |
| P          | 1,1018 | <b>0.151</b>             | <b>0.054</b> | <b>0.246</b> | 1,1054    | 0.101                    | -0.007       | 0.210        |
| N:P        | 1,1018 | -0.129                   | -0.267       | 0.008        | 1,1054    | -0.145                   | -0.299       | 0.007        |
|            | n=43   | R <sup>2</sup> =0.5/55.1 |              |              | n=45      | R <sup>2</sup> =0.2/65.3 |              |              |

148

| c) Forbs + grasses |        | Third year               |              |              | Last year |                          |              |              |
|--------------------|--------|--------------------------|--------------|--------------|-----------|--------------------------|--------------|--------------|
| Coeff.             | df     | Estim.                   | 2.50%        | 97.50%       | df        | Estim.                   | 2.50%        | 97.50%       |
| Interc.            | 1,45   | -0.060                   | -0.149       | 0.029        | 1,46      | -0.084                   | -0.194       | 0.023        |
| N                  | 1,1019 | <b>0.043</b>             | <b>0.013</b> | <b>0.073</b> | 1,1055    | <b>0.039</b>             | <b>0.009</b> | <b>0.070</b> |
|                    | n=43   | R <sup>2</sup> =0.3/58.1 |              |              | n=45      | R <sup>2</sup> =0.2/66.9 |              |              |

149 **Table S7.** Estimated means (Estim.) and bootstrapped 95% confidence intervals for changes in  
 150 N-fixing legume cover in the third and last years of the study as a function of changes in  
 151 community composition measures, soil N:P ratio, and N addition. Variables shown are those  
 152 retained in the reduced models after AIC elimination; the initial model also included LR<sub>PAR</sub> and  
 153 LR<sub>biomass</sub>. Bold indicates that the confidence interval does not include zero. 'n' indicates the  
 154 number of sites included in the analyses. R2 indicates the approximate proportion of variance  
 155 explained by fixed / random model terms.  
 156

|                                       | Third year   |               |               |               | Last year    |               |               |               |
|---------------------------------------|--------------|---------------|---------------|---------------|--------------|---------------|---------------|---------------|
|                                       | df           | Estim.        | 2.50%         | 97.50%        | df           | Estim.        | 2.50%         | 97.50%        |
| Intercept                             | 1,39         | 0.151         | -0.191        | 0.485         | 1,37         | 0.054         | -0.309        | 0.416         |
| <b>N</b>                              | <b>1,793</b> | <b>-0.293</b> | <b>-0.444</b> | <b>-0.139</b> | <b>1,763</b> | <b>-0.329</b> | <b>-0.493</b> | <b>-0.172</b> |
| <b>LR<sub>F+G</sub></b>               | <b>1,857</b> | <b>-0.500</b> | <b>-0.710</b> | <b>-0.294</b> | <b>1,719</b> | <b>-0.406</b> | <b>-0.616</b> | <b>-0.197</b> |
| <b>Soil N_P ratio</b>                 | <b>1,140</b> | <b>0.240</b>  | <b>0.118</b>  | <b>0.363</b>  | <b>1,142</b> | <b>0.188</b>  | <b>0.061</b>  | <b>0.308</b>  |
| <b>Legumes<sub>initial site</sub></b> | <b>1,38</b>  | <b>-0.037</b> | <b>-0.065</b> | <b>-0.009</b> | <b>1,36</b>  | <b>-0.034</b> | <b>-0.063</b> | <b>-0.004</b> |
| <b>Legumes<sub>Sinit.</sub> : N</b>   | <b>1,789</b> | <b>-0.015</b> | <b>-0.028</b> | <b>-0.002</b> | <b>1,758</b> | <b>-0.018</b> | <b>-0.032</b> | <b>-0.005</b> |
|                                       | n=35         | R2=17.3/50.7  |               |               | n = 34       | R2=15.2/49.5  |               |               |

157



158 **Table S8.** Estimated means (Estim.) and bootstrapped 95% confidence intervals for the relative  
 159 change in photosynthetically active radiation (PAR) interception with nutrient addition  
 160 treatments in the third and last years of the study. Variables shown are those retained in the  
 161 reduced models after AIC elimination. Bold indicates that the confidence interval does not  
 162 include zero. 'n' indicates the number of sites included in the analyses. R2 indicates the  
 163 approximate proportion of variance explained by fixed / random model terms.

| Coeff.    | Third year    |               |                          |               | Last year     |               |                          |               |
|-----------|---------------|---------------|--------------------------|---------------|---------------|---------------|--------------------------|---------------|
|           | df            | Estim.        | 2.50%                    | 97.50%        | df            | Estim.        | 2.50%                    | 97.50%        |
| Intercept | 1, 33         | -0.046        | -0.102                   | 0.009         | 1, 35         | -0.006        | -0.062                   | 0.049         |
| N         | <b>1, 750</b> | <b>-0.044</b> | <b>-0.059</b>            | <b>-0.029</b> | <b>1, 780</b> | <b>-0.050</b> | <b>-0.064</b>            | <b>-0.036</b> |
| P         | <b>1, 750</b> | <b>-0.035</b> | <b>-0.049</b>            | <b>-0.020</b> | <b>1, 780</b> | <b>-0.046</b> | <b>-0.060</b>            | <b>-0.032</b> |
|           | n=32          |               | R <sup>2</sup> =3.2/68.8 |               | n=34          |               | R <sup>2</sup> =2.1/68.4 |               |

164

165 **Table S9.** Estimated means (Estim.) and bootstrapped 95% confidence intervals for the logits of colonization  
 166 (a) and local extinction (b) of all legumes, perennials and annuals/biennials in the third and last years of the  
 167 study. Colonization was calculated as the number of legume species that were absent initially but appeared in a  
 168 plot in the 3<sup>rd</sup> or last year, divided by the total number of legume species present in the third or last year.  
 169 Extinction was calculated as the number of legume species that were present initially but absent in the third or  
 170 last year, divided by the total number of legume species present initially. Colonization and extinction were  
 171 modelled as logits, though back-transformed probabilities are reported. Variables shown are those retained in  
 172 the reduced models after AIC elimination; the initial models included all nutrient addition treatments and initial  
 173 legume cover. The probability of colonization and extinction for the intercept (Int., -N) and nutrient addition  
 174 treatments is provided. Bold indicates that the confidence interval does not include zero. Plot number varied  
 175 among models, thus 'n' indicates the number of sites/blocks/observations included in the analyses. R<sup>2</sup> indicates  
 176 the approximate proportion of variance explained by fixed / random model terms.

177  
 178 a) Colonization

|         |        | Third year    |               |                          |       | Last year     |                |                          |       |
|---------|--------|---------------|---------------|--------------------------|-------|---------------|----------------|--------------------------|-------|
|         | Coeff. | Estim.        | 2.5%          | 97.5%                    | Prob. | Estim.        | 2.5%           | 97.5%                    | Prob. |
| Total   | Int.   | -0.648        | -1.775        | 0.299                    | 0.343 | -0.971        | -2.537         | 0.155                    | 0.275 |
|         | N      | <b>-1.048</b> | <b>-1.623</b> | <b>-0.511</b>            | 0.155 | <b>-1.230</b> | <b>-1.876</b>  | <b>-0.645</b>            | 0.099 |
|         |        | n= 32/93/468  |               | R <sup>2</sup> =2.6/58.6 |       | n= 33/96/479  |                | R <sup>2</sup> =2.8/68.2 |       |
| Perenn. | Int.   | <b>-2.565</b> | <b>-5.965</b> | <b>-1.468</b>            | 0.055 | <b>-3.182</b> | <b>-7.843</b>  | <b>-1.971</b>            | 0.040 |
|         | N      | <b>-0.866</b> | <b>-1.482</b> | <b>-0.319</b>            | 0.027 | <b>-0.895</b> | <b>-1.614</b>  | <b>-0.275</b>            | 0.017 |
|         |        | n= 35/113/674 |               | R <sup>2</sup> =1.3/62.2 |       | n= 36/116/685 |                | R <sup>2</sup> =1.3/68.4 |       |
| Annual  | Int.   | -7.613        | -11.874       | -6.697                   | 0.001 | <b>-9.198</b> | <b>-12.470</b> | <b>-8.279</b>            | 0.000 |
|         | N      | <b>-1.148</b> | <b>-2.352</b> | <b>-0.335</b>            | 0.001 | <b>-2.026</b> | <b>-3.726</b>  | <b>-1.139</b>            | 0.000 |
|         |        | n= 41/127/894 |               | R <sup>2</sup> =0.0/0.0  |       | n= 43/133/936 |                | R <sup>2</sup> =0.0/0.0  |       |

179  
 180

b) Extinction

|         |        | Third year    |               |                           |              | Last year     |               |                          |              |
|---------|--------|---------------|---------------|---------------------------|--------------|---------------|---------------|--------------------------|--------------|
|         | Coeff. | Estim.        | 2.5%          | 97.5%                     | Prob.        | Estim.        | 2.5%          | 97.5%                    | Prob.        |
| Total   | Int.   | <b>-1.063</b> | <b>-1.691</b> | <b>-0.449</b>             | <b>0.257</b> | <b>-0.645</b> | <b>-1.265</b> | <b>-0.043</b>            | <b>0.344</b> |
|         | N      | <b>0.905</b>  | <b>0.516</b>  | <b>1.317</b>              | <b>0.461</b> | <b>0.936</b>  | <b>0.567</b>  | <b>1.330</b>             | <b>0.572</b> |
|         |        | n= 40/116/695 |               | R <sup>2</sup> =5.2/39.8  |              | n= 42/122/726 |               | R <sup>2</sup> =4.3/37.8 |              |
| Perenn. | Int.   | <b>-1.283</b> | <b>-2.348</b> | <b>-0.377</b>             | <b>0.217</b> | <b>-0.670</b> | <b>-1.396</b> | <b>0.063</b>             | <b>0.338</b> |
|         | N      | <b>0.697</b>  | <b>0.189</b>  | <b>1.219</b>              | <b>0.358</b> | <b>0.607</b>  | <b>0.172</b>  | <b>1.070</b>             | <b>0.484</b> |
|         |        | n= 32/87/489  |               | R <sup>2</sup> =2.7/54.4  |              | n= 34/93/520  |               | R <sup>2</sup> =3.8/39.0 |              |
| Annual  | Int.   | -0.185        | -0.995        | 0.620                     | 0.454        | 1.049         | -0.074        | 2.375                    | 0.741        |
|         | N      | <b>1.169</b>  | <b>0.561</b>  | <b>1.844</b>              | <b>0.728</b> | 0.553         | -0.402        | 1.602                    | 0.832        |
|         | P      |               |               |                           |              | <b>-1.529</b> | <b>-2.616</b> | <b>-0.662</b>            | <b>0.382</b> |
|         | N:P    |               |               |                           |              | <b>1.461</b>  | <b>0.112</b>  | <b>3.002</b>             | <b>0.823</b> |
|         |        | n= 19/53/269  |               | R <sup>2</sup> =11.6/42.2 |              | n= 19/53/269  |               | R <sup>2</sup> =6.9/56.9 |              |

181

182 **Table S10.** Multiple regression results for the effect of initial soil (a), initial community (b) and  
 183 climate predictors (c) on the predicted N addition effect at the site level for the third and last  
 184 experimental year on legume cover. The predicted N-addition effect for each site was obtained  
 185 from the N x Site interaction. Independent variables were standardized (Z-scores). Bold  
 186 indicates terms consistently significant across third and last experimental year. Model fit and  
 187 descriptors are below each table (R.S.E.: residual standard error; F-values and degrees of  
 188 freedom; P-values; coefficients of determination).

189  
 190 a) Initial soil

| Coeff.                 | Third year                                                                                                 |              |              |              | Last year                                                                                                   |              |              |              |
|------------------------|------------------------------------------------------------------------------------------------------------|--------------|--------------|--------------|-------------------------------------------------------------------------------------------------------------|--------------|--------------|--------------|
|                        | Estim.                                                                                                     | S.E.         | t            | P            | Estim.                                                                                                      | S.E.         | t            | P            |
| Intercept              | -0.36                                                                                                      | 0.068        | -5.32        | 0.000        | -0.96                                                                                                       | 0.301        | -3.20        | 0.003        |
| <b>Soil N (%)</b>      | <b>0.23</b>                                                                                                | <b>0.086</b> | <b>2.69</b>  | <b>0.012</b> | <b>0.16</b>                                                                                                 | <b>0.070</b> | <b>2.36</b>  | <b>0.025</b> |
| <b>Soil Fe (ppm)</b>   | <b>-0.28</b>                                                                                               | <b>0.079</b> | <b>-3.51</b> | <b>0.002</b> | <b>-0.24</b>                                                                                                | <b>0.072</b> | <b>-3.26</b> | <b>0.003</b> |
| <b>Soil K (ppm)</b>    | <b>0.31</b>                                                                                                | <b>0.106</b> | <b>2.93</b>  | <b>0.007</b> | <b>0.25</b>                                                                                                 | <b>0.075</b> | <b>3.42</b>  | <b>0.002</b> |
| Soil S (ppm)           | -0.16                                                                                                      | 0.100        | -1.62        | 0.117        |                                                                                                             |              |              |              |
| Soil Na (ppm)          | -0.17                                                                                                      | 0.093        | -1.82        | 0.080        |                                                                                                             |              |              |              |
| Soil B (ppm)           | -0.15                                                                                                      | 0.095        | -1.61        | 0.118        |                                                                                                             |              |              |              |
| Soil Ca (ppm)          |                                                                                                            |              |              |              | -0.30                                                                                                       | 0.070        | -4.25        | 0.000        |
| Soil Mn (ppm)          |                                                                                                            |              |              |              | 0.19                                                                                                        | 0.088        | 2.13         | 0.042        |
| Soil Cu (ppm)          |                                                                                                            |              |              |              | -0.26                                                                                                       | 0.084        | -3.06        | 0.005        |
| Years of treatment (#) |                                                                                                            |              |              |              | 0.13                                                                                                        | 0.058        | 2.20         | 0.036        |
|                        | R.S.E.=0.4; F <sub>6,28</sub> =4.97; P=0.001<br>R <sup>2</sup> =0.52; R <sup>2</sup> <sub>Adj.</sub> =0.41 |              |              |              | R.S.E.=0.36; F <sub>7,29</sub> =7.12; P<0.001<br>R <sup>2</sup> =0.63; R <sup>2</sup> <sub>Adj.</sub> =0.54 |              |              |              |

191

192 b) Initial community

| Coeff.                      | Third year                                                                                                  |              |              |              | Last year                                                                                                    |              |              |              |
|-----------------------------|-------------------------------------------------------------------------------------------------------------|--------------|--------------|--------------|--------------------------------------------------------------------------------------------------------------|--------------|--------------|--------------|
|                             | Estim.                                                                                                      | S.E.         | t            | P            | Estim.                                                                                                       | S.E.         | t            | P            |
| Intercept                   | -0.42                                                                                                       | 0.073        | -5.70        | 0.000        | -0.36                                                                                                        | 0.062        | -5.75        | 0.000        |
| <b>Non-native cover</b>     | <b>-0.23</b>                                                                                                | <b>0.076</b> | <b>-3.01</b> | <b>0.005</b> | <b>-0.16</b>                                                                                                 | <b>0.063</b> | <b>-2.53</b> | <b>0.015</b> |
| <b>Legume richness</b>      | <b>-0.18</b>                                                                                                | <b>0.082</b> | <b>-2.23</b> | <b>0.032</b> | <b>-0.20</b>                                                                                                 | <b>0.069</b> | <b>-2.89</b> | <b>0.006</b> |
| <b>Initial legume cover</b> | <b>-0.19</b>                                                                                                | <b>0.079</b> | <b>-2.43</b> | <b>0.020</b> | <b>-0.15</b>                                                                                                 | <b>0.069</b> | <b>-2.13</b> | <b>0.039</b> |
| Forb cover                  | 0.13                                                                                                        | 0.075        | 1.74         | 0.090        |                                                                                                              |              |              |              |
|                             | R.S.E.=0.47; F <sub>4,37</sub> =7.54; P<0.001<br>R <sup>2</sup> =0.45; R <sup>2</sup> <sub>Adj.</sub> =0.39 |              |              |              | R.S.E.=0.41; F <sub>3,40</sub> =10.51; P<0.001<br>R <sup>2</sup> =0.44; R <sup>2</sup> <sub>Adj.</sub> =0.39 |              |              |              |

193

194 c) Climate

| Coeff.                   | Third year                                                                                                  |              |              |              | Last year                                                                                                   |              |              |              |
|--------------------------|-------------------------------------------------------------------------------------------------------------|--------------|--------------|--------------|-------------------------------------------------------------------------------------------------------------|--------------|--------------|--------------|
|                          | Estim.                                                                                                      | S.E.         | t            | P            | Estim.                                                                                                      | S.E.         | t            | P            |
| Intercept                | -0.41                                                                                                       | 0.087        | -4.66        | 0.000        | -0.97                                                                                                       | 0.340        | -2.85        | 0.007        |
| <b>Mean annual temp.</b> | <b>-0.32</b>                                                                                                | <b>0.124</b> | <b>-2.55</b> | <b>0.015</b> | <b>-0.23</b>                                                                                                | <b>0.096</b> | <b>-2.43</b> | <b>0.019</b> |
| Latitude                 | -0.22                                                                                                       | 0.119        | -1.88        | 0.068        | -0.26                                                                                                       | 0.100        | -2.59        | 0.013        |
| Years of treatment (#)   |                                                                                                             |              |              |              | 0.12                                                                                                        | 0.064        | 1.85         | 0.071        |
|                          | R.S.E.=0.57; F <sub>2,40</sub> =3.26; P=0.048<br>R <sup>2</sup> =0.14; R <sup>2</sup> <sub>Adj.</sub> =0.10 |              |              |              | R.S.E.=0.48; F <sub>3,41</sub> =5.16; P=0.029<br>R <sup>2</sup> =0.19; R <sup>2</sup> <sub>Adj.</sub> =0.13 |              |              |              |

195

196 **Table S11.** Multiple regression results for the effects of initial soil (a), initial community (b) and  
 197 climate predictors (c) on the predicted P-addition effect at the site level for the third and last  
 198 experimental year on legume cover. Predicted effect of P-addition for each site was obtained  
 199 from the P x Site interaction. Independent variables were standardized (Z-scores). Bold  
 200 indicates terms consistently significant across third and last experimental year. Model fit and  
 201 descriptors are below each table (Estim.: estimated mean; R.S.E.: residual standard error; F-  
 202 values and degrees of freedom; P-values; coefficients of determination). Stepwise elimination  
 203 did not conserve any climatic predictor for the effect of P for the third year on legume cover.  
 204

205 a) Initial soil

| Coeff.        | Third year                                                |       |       |       | Last year                                                 |       |       |       |
|---------------|-----------------------------------------------------------|-------|-------|-------|-----------------------------------------------------------|-------|-------|-------|
|               | Estim.                                                    | S.E.  | t     | P     | Estim.                                                    | S.E.  | t     | P     |
| Intercept     | 0.16                                                      | 0.051 | 3.16  | 0.003 | 0.22                                                      | 0.063 | 3.41  | 0.002 |
| Soil Mn (ppm) | -0.19                                                     | 0.065 | -2.93 | 0.006 | -0.16                                                     | 0.081 | -1.95 | 0.060 |
| Soil Cu (ppm) | 0.13                                                      | 0.066 | 1.94  | 0.061 | 0.13                                                      | 0.082 | 1.56  | 0.129 |
| Soil Na (ppm) | 0.10                                                      | 0.053 | 1.98  | 0.057 |                                                           |       |       |       |
| Soil Ca (ppm) |                                                           |       |       |       | -0.13                                                     | 0.065 | -1.99 | 0.055 |
|               | R.S.E.=0.29; F <sub>3,31</sub> =4.18; P=0.013             |       |       |       | R.S.E.=0.38; F <sub>3,33</sub> =2.14; P=0.084             |       |       |       |
|               | R <sup>2</sup> =0.28; R <sup>2</sup> <sub>Adj</sub> =0.21 |       |       |       | R <sup>2</sup> =0.18; R <sup>2</sup> <sub>Adj</sub> =0.10 |       |       |       |

206

207 b) Initial community

| Coeff.               | Third year                                                |       |       |       | Last year                                                 |       |       |       |
|----------------------|-----------------------------------------------------------|-------|-------|-------|-----------------------------------------------------------|-------|-------|-------|
|                      | Estim.                                                    | S.E.  | t     | P     | Estim.                                                    | S.E.  | t     | P     |
| Intercept            | 0.21                                                      | 0.052 | 3.94  | 0.000 | 0.31                                                      | 0.067 | 4.59  | 0.000 |
| Native species cover | -0.09                                                     | 0.054 | -1.64 | 0.110 | -0.07                                                     | 0.070 | -0.93 | 0.358 |
| Legume richness      | 0.11                                                      | 0.054 | 1.96  | 0.057 | 0.12                                                      | 0.070 | 1.77  | 0.084 |
|                      | R.S.E.=0.33; F <sub>2,39</sub> =4.91; P=0.085             |       |       |       | R.S.E.=0.44; F <sub>2,41</sub> =1.69; P=0.196             |       |       |       |
|                      | R <sup>2</sup> =0.11; R <sup>2</sup> <sub>Adj</sub> =0.07 |       |       |       | R <sup>2</sup> =0.07; R <sup>2</sup> <sub>Adj</sub> =0.03 |       |       |       |

208

209 c) Climate

| Coeff.            | Third year             |       |      |       | Last year                                                 |       |       |       |
|-------------------|------------------------|-------|------|-------|-----------------------------------------------------------|-------|-------|-------|
|                   | Estim.                 | S.E.  | t    | P     | Estim.                                                    | S.E.  | t     | P     |
| Intercept         | 0.20                   | 0.054 | 3.73 | 0.001 | 0.30                                                      | 0.066 | 4.52  | 0.000 |
| Mean annual temp. |                        |       |      |       | -0.10                                                     | 0.067 | -1.49 | 0.144 |
|                   | R.S.E.=0.35 on 42 d.f. |       |      |       | R.S.E.=0.44; F <sub>1,43</sub> =2.21; P=0.144             |       |       |       |
|                   |                        |       |      |       | R <sup>2</sup> =0.05; R <sup>2</sup> <sub>Adj</sub> =0.02 |       |       |       |

210

211 **Table S12.** Multiple regression results for the effects of initial soil (a), initial community (b) and  
 212 climate predictors (c) on the K-addition effect at the site level for the third and last  
 213 experimental year on legume cover. Predicted effect of K-addition for each site was obtained  
 214 from the K x Site interaction. Independent variables were standardized (Z-scores). Bold  
 215 indicated terms consistently significant across the third and last experimental year. Model fit  
 216 and descriptors are below each table (R.S.E.: residual standard error; F-values and degrees of  
 217 freedom; P-values; coefficients of determination). Stepwise elimination did not conserve any  
 218 climatic predictor for the effect of K on legume cover.

219

220 a) Initial soil

| Coeff.               | Third year                               |              |              |              | Last year                                |              |              |              |
|----------------------|------------------------------------------|--------------|--------------|--------------|------------------------------------------|--------------|--------------|--------------|
|                      | Estim.                                   | S.E.         | t            | P            | Estim.                                   | S.E.         | t            | P            |
| Intercept            | 0.11                                     | 0.056        | 1.93         | 0.064        | 0.11                                     | 0.054        | 2.06         | 0.048        |
| <b>Soil P (ppm)</b>  | <b>0.22</b>                              | <b>0.062</b> | <b>3.53</b>  | <b>0.001</b> | <b>0.20</b>                              | <b>0.063</b> | <b>3.20</b>  | <b>0.003</b> |
| <b>Soil K (ppm)</b>  | <b>-0.23</b>                             | <b>0.075</b> | <b>-3.10</b> | <b>0.004</b> | <b>-0.27</b>                             | <b>0.076</b> | <b>-3.59</b> | <b>0.001</b> |
| <b>Soil Fe (ppm)</b> | <b>-0.18</b>                             | <b>0.064</b> | <b>-2.77</b> | <b>0.010</b> | <b>-0.16</b>                             | <b>0.063</b> | <b>-2.50</b> | <b>0.018</b> |
| Soil Na (ppm)        | 0.13                                     | 0.076        | 1.74         | 0.092        | 0.13                                     | 0.074        | 1.82         | 0.079        |
| Soil Mn (ppm)        |                                          |              |              |              | 0.14                                     | 0.061        | 2.25         | 0.032        |
|                      | R.S.E.=0.33; $F_{4,30}=5.07$ ; $P=0.003$ |              |              |              | R.S.E.=0.32; $F_{5,31}=5.19$ ; $P=0.001$ |              |              |              |
|                      | $R^2=0.40$ ; $R^2_{Adj.}=0.32$           |              |              |              | $R^2=0.45$ ; $R^2_{Adj.}=0.37$           |              |              |              |

221

222 b) Initial community

| Coeff.               | Third year                               |       |       |       | Last year                                |       |       |       |
|----------------------|------------------------------------------|-------|-------|-------|------------------------------------------|-------|-------|-------|
|                      | Estim.                                   | S.E.  | t     | P     | Estim.                                   | S.E.  | t     | P     |
| Intercept            | 0.08                                     | 0.058 | 1.40  | 0.169 | 0.07                                     | 0.062 | 1.14  | 0.263 |
| Native species cover | -0.16                                    | 0.062 | -2.64 | 0.012 | -0.13                                    | 0.067 | -1.87 | 0.068 |
| Legume cover         | 0.14                                     | 0.061 | 2.31  | 0.026 | 0.09                                     | 0.066 | 1.42  | 0.162 |
|                      | R.S.E.=0.37; $F_{2,39}=4.53$ ; $P=0.017$ |       |       |       | R.S.E.=0.41; $F_{2,41}=2.07$ ; $P=0.139$ |       |       |       |
|                      | $R^2=0.18$ ; $R^2_{Adj.}=0.14$           |       |       |       | $R^2=0.09$ ; $R^2_{Adj.}=0.05$           |       |       |       |

223

224 c) Climate

| Coeff.    | Third year             |       |      |       | Last year              |       |      |       |
|-----------|------------------------|-------|------|-------|------------------------|-------|------|-------|
|           | Estim.                 | S.E.  | t    | P     | Estim.                 | S.E.  | t    | P     |
| Intercept | 0.08                   | 0.062 | 1.33 | 0.192 | 0.07                   | 0.062 | 1.08 | 0.287 |
|           | R.S.E.=0.40 on 42 d.f. |       |      |       | R.S.E.=0.42 on 44 d.f. |       |      |       |

225
